# Supplementary material for: A multi-ancestry polygenic risk score improves risk prediction for coronary artery disease
Source: PubMed Central journal article supplement (PMC10353935; doi:10.1038/s41591-023-02429-x), 2023-07-06
Supplement: 41591_2023_2429_MOESM1_ESM.pdf [file 41591_2023_2429_MOESM1_ESM.pdf]

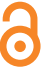

---

# A multi-ancestry polygenic risk score improves risk prediction for coronary artery disease

---

In the format provided by the authors and unedited

## Table of Contents

### ***Supplementary Tables:***

Table 1: GPS<sub>Mult</sub> inputs and parameters

Table 2: Summary of GPS<sub>Mult</sub> training and validation datasets

Table 3: Performance of polygenic scores for CAD from Polygenic Score Catalog in the UK Biobank Study

Table 4: Baseline risk factor distributions and correlations with GPS<sub>Mult</sub> in the UK Biobank Study

Table 5: Baseline characteristics according to high GPS<sub>Mult</sub> in the UK Biobank Study

Table 6: Performance of polygenic scores for CAD from Polygenic Score Catalog in the Million Veteran Program Study

Table 7: Performance of polygenic scores for CAD from Polygenic Score Catalog in the Genes & Health Study

Table 8: Model C-statistics by ancestry in the UK Biobank Study

Table 9: Model net reclassification by ancestry in the UK Biobank Study

### ***References***

### ***Consortia Acknowledgements***

**Table 1:** GPS<sub>Mult</sub> inputs and parameters

| Trait | Name                        | Dominant Ancestry | N Cases | N Controls | $\rho$ | $h^2$ scale | Is sparse LD | Train OR/SD | Layer 1 Mixing weight | Layer 2 Mixing weight | Final Weight | Reference |
|-------|-----------------------------|-------------------|---------|------------|--------|-------------|--------------|-------------|-----------------------|-----------------------|--------------|-----------|
| CAD   | CARDIO-GRAM plusC4D no UKBB | EUR               | 86847   | 417789     | 0.018  | 1           | F            | 1.92        | 0.51                  | 0.67                  | 0.263        | 1         |
|       | BBJ                         | EAS               | 29319   | 183134     | 0.01   | 0.7         | F            | 1.43        | 0.08                  |                       | 0.041        | 2         |
|       | Genes & Health              | SAS               | 1110    | 20898      | 0.0056 | 1.4         | F            | 1.11        | 0.05                  |                       | 0.026        | 3         |
|       | FinnGen                     | EUR               | 33628   | 275526     | 0.0032 | 1.4         | F            | 1.46        | 0.02                  |                       | 0.010        | 4         |
|       | MVP                         | EUR               | 95151   | 197287     | 0.018  | 0.7         | F            | 1.72        | 0.23                  |                       | 0.120        | 5         |
|       | MVP                         | AFR               | 17202   | 59507      | 0.018  | 1.4         | F            | 1.10        | 0.01                  |                       | 0.006        | 5         |
|       | MVP                         | HISP              | 6378    | 24270      | 0.0018 | 0.7         | F            | 1.16        | 0.00                  |                       | 0.000        | 5         |
| BMI   | GIANT                       | EUR               | 339224  |            | 1      | 1           | T            | 1.12        | 0.11                  | 0.03                  | 0.014        | 6         |
|       | BBJ                         | EAS               | 163835  |            | 0.32   | 0.7         | F            | 1.06        | 0.05                  |                       | 0.007        | 2         |
| DBP   | MVP                         | EUR               | 249262  |            | 0.032  | 1.4         | F            | 1.11        | 0.12                  | 0.08                  | 0.038        | 7         |
|       | BBJ                         | EAS               | 145515  |            | 0.01   | 0.7         | F            | 1.07        | 0.06                  |                       | 0.019        | 2         |
| SBP   | MVP                         | EUR               | 249262  |            | 0.032  | 0.7         | F            | 1.19        | 0.19                  | 0.00                  | 0.000        | 7         |
|       | BBJ                         | EAS               | 145505  |            | 0.018  | 1.4         | F            | 1.09        | 0.05                  |                       | 0.000        | 2         |
| DM    | Diamante/MVP                | EUR               | 148726  | 965732     | 1      | 1.4         | T            | 1.31        | 0.29                  | 0.33                  | 0.179        | 8         |

|       |                |      |         |        |             |     |   |      |      |      |       |    |
|-------|----------------|------|---------|--------|-------------|-----|---|------|------|------|-------|----|
|       | MVP            | AFR  | 24646   | 31446  | 0.018       | 0.7 | F | 1.06 | 0.00 |      | 0.000 | 8  |
|       | MVP            | HISP | 8,616   | 11,829 | 0.032       | 1.4 | T | 1.09 | 0.04 |      | 0.027 | 8  |
|       | AGEN T2D       | EAS  | 77418   | 356122 | 0.56        | 1   | T | 1.14 | 0.01 |      | 0.005 | 9  |
|       | FinnGen        | EUR  | 49303   | 255466 | 0.032       | 1.4 | F | 1.16 | 0.03 |      | 0.018 | 4  |
|       | Genes & Health | SAS  | 9044    | 12066  | 0.0056      | 1.4 | F | 1.05 | 0.00 |      | 0.000 | 10 |
|       | GLGC           | EUR  | 1320016 |        | 0.1         | 0.7 | T | 1.22 | 0.26 |      | 0.028 | 11 |
|       | GLGC           | AFR  | 99432   |        | 0.01        | 0.7 | T | 1.15 | 0.07 |      | 0.007 | 11 |
|       | GLGC           | SAS  | 40963   |        | 0.0003<br>2 | 1.4 | T | 1.15 | 0.00 |      | 0.000 | 11 |
|       | MVP            | EUR  | 215551  |        | 0.01        | 0.7 | T | 1.17 | 0.14 |      | 0.015 | 12 |
|       | MVP            | AFR  | 57332   |        | 0.0056      | 0.7 | T | 1.13 | 0.05 |      | 0.005 | 12 |
|       | MVP            | HISP | 24742   |        | 0.0018      | 0.7 | T | 1.18 | 0.09 |      | 0.009 | 12 |
| LDL-C | BBJ            | EAS  | 72866   |        | 0.0032      | 0.7 | T | 1.13 | 0.00 | 0.09 | 0.000 | 2  |
|       | GLGC           | EUR  | 1320016 |        | 1           | 0.7 | T | 1.24 | 0.07 |      | 0.009 | 11 |
|       | GLGC           | AFR  | 99432   |        | 0.32        | 1.4 | F | 1.08 | 0.00 |      | 0.000 | 11 |
|       | GLGC           | SAS  | 40963   |        | 0.001       | 1   | T | 1.05 | 0.04 |      | 0.006 | 11 |
|       | MVP            | EUR  | 215551  |        | 0.32        | 1   | F | 1.20 | 0.20 |      | 0.026 | 12 |
| HDL-C | MVP            | AFR  | 57332   |        | 0.0056      | 1   | F | 1.07 | 0.00 | 0.06 | 0.000 | 12 |

|        |             |      |         |        |        |     |   |      |      |      |       |    |
|--------|-------------|------|---------|--------|--------|-----|---|------|------|------|-------|----|
|        | MVP         | HISP | 23946   |        | 0.056  | 1.4 | F | 1.08 | 0.00 |      | 0.000 | 12 |
|        | BBJ         | EAS  | 74970   |        | 0.32   | 0.7 | F | 1.06 | 0.00 |      | 0.000 | 2  |
| TG     | GLGC        | EUR  | 1320016 |        | 1      | 0.7 | T | 1.24 | 0.24 | 0.00 | 0.000 | 11 |
|        | GLGC        | AFR  | 99432   |        | 0.018  | 1.4 | F | 1.09 | 0.00 |      | 0.000 | 11 |
|        | GLGC        | SAS  | 40963   |        | 0.01   | 0.7 | F | 1.09 | 0.00 |      | 0.000 | 11 |
|        | MVP         | EUR  | 215551  |        | 0.18   | 1   | F | 1.19 | 0.00 |      | 0.000 | 12 |
|        | MVP         | AFR  | 57332   |        | 0.032  | 0.7 | F | 1.07 | 0.00 |      | 0.000 | 12 |
|        | MVP         | HISP | 24063   |        | 0.018  | 1.4 | F | 1.08 | 0.00 |      | 0.000 | 12 |
|        | BBJ         | EAS  | 111667  |        | 0.056  | 0.7 | T | 1.07 | 0.00 |      | 0.000 | 2  |
| PAD    | MVP         | EUR  | 24009   | 150983 | 0.01   | 0.7 | F | 1.32 | 0.25 | 0.04 | 0.012 | 13 |
|        | MVP         | AFR  | 5273    | 42485  | 1      | 1.4 | T | 1.07 | 0.05 |      | 0.002 | 13 |
|        | MVP         | HISP | 1925    | 18285  | 0.0032 | 1.4 | T | 1.07 | 0.03 |      | 0.002 | 13 |
|        | FinnGen     | EUR  | 11924   | 288638 | 0.0056 | 0.7 | F | 1.16 | 0.08 |      | 0.004 | 4  |
|        | BBJ         | EAS  | 4112    | 173601 | 0.0032 | 0.7 | F | 1.13 | 0.09 |      | 0.004 | 2  |
| Stroke | MEGA-STROKE | EUR  | 40585   | 406111 | 0.0032 | 0.7 | T | 1.17 | 0.17 | 0.07 | 0.030 | 14 |
|        | BBJ         | EAS  | 22664   | 152022 | 0.56   | 1.4 | T | 1.06 | 0.05 |      | 0.010 | 2  |
|        | GBMI        | AFR  | 1161    | 24416  | 0.018  | 1.4 | T | 1.04 | 0.05 |      | 0.010 | 15 |
| CKD    | MVP         | EUR  | 223386  |        | 0.0001 | 0.7 | T | 1.05 | 0.04 | 0.06 | 0.025 | 16 |

|  |     |     |        |        |     |   |      |      |  |       |    |
|--|-----|-----|--------|--------|-----|---|------|------|--|-------|----|
|  | MVP | AFR | 57336  | 0.018  | 1   | F | 1.04 | 0.03 |  | 0.019 | 16 |
|  | BBJ | EAS | 150266 | 0.0056 | 0.7 | T | 1.02 | 0.00 |  | 0.000 | 2  |

Traits: CAD – coronary artery disease; BMI – body mass index; DBP – diastolic blood pressure; SBP – systolic blood pressure; DM – diabetes mellitus; LDL-C – low density lipoprotein cholesterol; HDL-C – high-density lipoprotein cholesterol; TG – triglycerides; PAD – peripheral artery disease; CKD – chronic kidney disease.

Consortia: CARDIOGRAMplusC4D no UKBB – Coronary ARtery Disease Genome wide Replication and Meta-analysis plus The Coronary Artery Disease Genetics consortium excluding UK Biobank; BBJ – Biobank Japan; GIANT – Genetic Investigation of ANthropometric Traits; MVP – Million Veteran Program; AGEN-T2D – Asian Genetic Epidemiology Network Type 2 Diabetes Consortium; GLGC – Global Lipids Genetics Consortium excluding the UK Biobank; GBMI – Global Biobank Meta-analysis Initiative

Ancestries: AFR – African; EAS – East Asian; EUR – European; SAS – South Asian

LDPred2 parameters:  $\rho$  – tuning parameter to model the proportion of variants assumed to be causal;  $h^2$  scale – factor by which heritability is scaled; is sparse LD – whether a sparse linkage disequilibrium matrix is applied, if true some variant effect estimates are fit to zero. A total of 102 combinations of these three parameters were possible and led to generation of 102 polygenic scores for each input ancestry-stratified set of GWAS summary statistics. The parameters leading to the best individually performing polygenic score in predicting CAD in a training dataset of 116,649 participants in the UK Biobank were chosen, specific to each ancestry-specific GWAS.

Mixing weights: Layer 1 – weight determined from a logistic regression model predicting CAD in a UK Biobank training dataset by combining different ancestry-specific GPS from GWAS for a specific trait. Layer 2 - weight determined from a logistic regression model predicting CAD in the same UKB training dataset by combining different multi-ancestry trait-specific scores from the Layer 1 step. Final weight - overall mixing weight incorporating proportional weights from layers 1 and 2, normalized to 100%. The final  $GPS_{Mult}$  score was a linear combination of all the input scores according to the final weight. The dataset for training the models and for estimating the mixing weight was from 116,649 participants in the UK Biobank. All the regression models for predicting CAD were adjusted for age, sex, genotyping array, and the first ten principal components of ancestry.

**Table 2:** Summary of GPS<sub>Mult</sub> training and validation datasets

| Stage        | Training   | Validation |            |            |             |             |             |             |             |
|--------------|------------|------------|------------|------------|-------------|-------------|-------------|-------------|-------------|
| Cohort       | UK Biobank | UK Biobank |            |            |             | MVP         |             |             | G&H         |
| Ancestry     | European   | African    | East Asian | European   | South Asian | African     | European    | Hispanic    | South Asian |
| N            | 116649     | 7281       | 1464       | 308264     | 8982        | 33096       | 124467      | 16433       | 16874       |
| Age (SD)     | 57.5 (7.9) | 52.4 (8.0) | 53.0 (7.6) | 57.3 (8.0) | 53.8 (8.5)  | 56.1 (12.4) | 60.8 (13.3) | 51.9 (15.5) | 40.6 (14.5) |
| Male Sex (%) | 47.5%      | 43.5%      | 37.2%      | 45.6%      | 54.1%       | 84.1%       | 91.3%       | 87.7%       | 45.9%       |
| Case         | 4412       | 124        | 22         | 10492      | 542         | 4831        | 29171       | 2140        | 853         |
| Control      | 112237     | 7157       | 1442       | 297772     | 8440        | 28265       | 95296       | 14293       | 16021       |

Baseline demographics of participants included in GPS<sub>Mult</sub> training and validation. These individuals were not included in genome-wide association data used to construct GPS<sub>Mult</sub>, and individuals in training and validation of GPS<sub>Mult</sub> are distinct. MVP: Million Veteran Program; G&H: Genes & Health. SD: Standard deviation

**Table 3:** Performance of polygenic scores for CAD from Polygenic Score Catalog in the UK Biobank Study

| Score Name              | Identifier | Publication                                            | OR/SD [95% CI]   | P                    | Population |
|-------------------------|------------|--------------------------------------------------------|------------------|----------------------|------------|
| GRS28                   | PGS000200  | Tikkanen E et al. Arterioscler Thromb Vasc Biol (2013) | 1.31 [1.31-1.34] | $<2 \times 10^{-16}$ | EUR        |
| GRS27                   | PGS000010  | Mega JL et al. Lancet (2015)                           | 1.35 [1.35-1.38] | $<2 \times 10^{-16}$ | EUR        |
| GRS50                   | PGS000011  | Tada H et al. Eur Heart J (2015)                       | 1.34 [1.34-1.37] | $<2 \times 10^{-16}$ | EUR        |
| GRS49K                  | PGS000012  | Abraham G et al. Eur Heart J (2016)                    | 1.44 [1.44-1.47] | $<2 \times 10^{-16}$ | EUR        |
| CHD57                   | PGS000057  | Natarajan P et al. Circulation (2017)                  | 1.34 [1.34-1.37] | $<2 \times 10^{-16}$ | EUR        |
| GRS_CAD                 | PGS000019  | Paquette M et al. J Clin Lipidol (2017)                | 1.49 [1.49-1.52] | $<2 \times 10^{-16}$ | EUR        |
| GPS <sub>2018</sub>     | PGS000013  | Khera AV et al. Nat Genet (2018)                       | 1.72 [1.72-1.76] | $<2 \times 10^{-16}$ | EUR        |
| metaGRS_CAD             | PGS000018  | Inouye M et al. J Am Coll Cardiol (2018)               | 1.77 [1.77-1.8]  | $<2 \times 10^{-16}$ | EUR        |
| CHD46                   | PGS000059  | Hajek C et al. Circ Genom Precis Med (2018)            | 1.27 [1.27-1.3]  | $<2 \times 10^{-16}$ | EUR        |
| CAD_EJ2020              | PGS000116  | Elliott J et al. JAMA (2020)                           | 1.53 [1.53-1.56] | $<2 \times 10^{-16}$ | EUR        |
| PRS_COMBINED            | PGS000749  | Gola D et al. Circ Genom Precis Med (2020)             | 1.49 [1.49-1.52] | $<2 \times 10^{-16}$ | EUR        |
| PRS_CHD                 | PGS000329  | Mars N et al. Nat Med (2020)                           | 1.64 [1.64-1.68] | $<2 \times 10^{-16}$ | EUR        |
| GPS_CAD_SA              | PGS000296  | Wang M et al. J Am Coll Cardiol (2020)                 | 1.67 [1.67-1.71] | $<2 \times 10^{-16}$ | EUR        |
| PRS70_CAD               | PGS000349  | Pechlivanis S et al. BMC Med Genet (2020)              | 1.14 [1.14-1.17] | $<2 \times 10^{-16}$ | EUR        |
| GRS_Metabo              | PGS000818  | Bauer A et al. Genet Epidemiol (2021)                  | 1.48 [1.48-1.51] | $<2 \times 10^{-16}$ | EUR        |
| AnnoPred <sub>CAD</sub> | PGS001355  | Ye Y et al. Circ Genom Precis Med (2021)               | 1.76 [1.76-1.8]  | $<2 \times 10^{-16}$ | EUR        |
| metaPRS_CAD             | PGS002262  | Lu X et al. Eur Heart J (2022)                         | 1.30 [1.3-1.32]  | $<2 \times 10^{-16}$ | EUR        |



|                     |           |                                       |                  |                      |     |
|---------------------|-----------|---------------------------------------|------------------|----------------------|-----|
| CHD_PRSCS           | PGS001780 | Tamlander M et al. Commun Biol (2022) | 1.73 [1.73-1.77] | $<2 \times 10^{-16}$ | EUR |
| GPS <sub>Mult</sub> | -         | -                                     | 2.14 [2.10-2.19] | $<2 \times 10^{-16}$ | EUR |

A series of prior published scores or CAD from the Polygenic Score Catalog that did not include any UK Biobank participants in the GWAS data for score development were compared with GPS<sub>Mult</sub> within the validation cohort of European ancestry individuals from the UK Biobank. The odds ratio for prevalent coronary artery disease (CAD) risk per standard deviation (ORS/SD) of the polygenic score and 95% confidence interval were assessed in a logistic regression model adjusted for age, sex, genotyping array, and the first ten principal components of ancestry. *P* values are derived from a *t*-test implemented in the GLM function in R and are two-sided. Beta: Effect size from logistic regression; SE: standard error.

**Table 4:** Baseline risk factor distributions and correlations with GPS<sub>Mult</sub>

|                                                      | <b>Prevalent CAD</b>       | <b>Incident CAD</b>        | <b>No CAD</b>             | <b>All</b>                | <b>Correlation</b> |
|------------------------------------------------------|----------------------------|----------------------------|---------------------------|---------------------------|--------------------|
| <b>N</b>                                             | 11180                      | 11898                      | 302913                    | 325991                    |                    |
| <b>LDL Cholesterol* (mg/dl, mean (SD))</b>           | 143.78 (35.76)             | 156.08 (35.81)             | 145.25 (32.95)            | 145.60 (33.22)            | 0.152              |
| <b>HDL Cholesterol* (mg/dl, mean (SD))</b>           | 46.20 (12.16)              | 50.49 (13.19)              | 56.72 (14.81)             | 56.13 (14.84)             | -0.115             |
| <b>Triglycerides* (mg/dl, median [IQR])</b>          | 170.17<br>[118.87, 243.84] | 167.25<br>[117.68, 241.03] | 131.98<br>[92.65, 192.47] | 134.37<br>[93.98, 196.19] | 0.108              |
| <b>Systolic Blood Pressure (mm Hg, mean (SD))</b>    | 140.00 (19.86)             | 147.28 (20.06)             | 139.37 (19.56)            | 139.68 (19.64)            | 0.081              |
| <b>Diastolic Blood Pressure (mm Hg, mean (SD))</b>   | 78.94 (10.93)              | 84.57 (10.94)              | 82.27 (10.66)             | 82.24 (10.71)             | 0.071              |
| <b>Body-mass Index (kg/m<sup>2</sup>, mean (SD))</b> | 29.13 (4.77)               | 28.58 (4.79)               | 27.26 (4.74)              | 27.37 (4.76)              | 0.108              |
| <b>Diabetes Mellitus<sup>#</sup> (%)</b>             | 2197 (19.7)                | 1460 (12.3)                | 14012 (4.6)               | 17669 (5.4)               | 0.028              |
| <b>Chronic Kidney Disease<sup>#</sup> (%)</b>        | 1621 (15.2)                | 1134 (10.0)                | 11484 (4.0)               | 14239 (4.6)               | 0.091              |

The baseline variable distributions for traditional coronary artery disease (CAD) risk factors stratified by CAD case status. Correlations between the GPS<sub>Mult</sub> and risk factors across the population, adjusted for top 10 principal components and traditional risk factors were assessed using Pearson's correlation for continuous traits and <sup>#</sup>point biserial correlation for binary traits. The P value for each association was less than  $2 \times 10^{-12}$ . \*LDL-C, HDL-C, and triglyceride values adjusted if individual taking cholesterol lowering medications as described in Patel et al. *JAMA Network Open* 2020.<sup>17</sup> For example, in the case of statin intake, lower density cholesterol was divided by 0.7 and triglycerides by 0.85. Diagnosis of diabetes was based on self-report, primary care records or hospitalization records confirming a clinical diagnosis, self-reported consumption of medications to treat diabetes, or glycohemoglobin >6.5% at enrollment and chronic kidney disease was defined as eGFR<sub>Cys</sub> <60 mL/min, as previously described.<sup>18</sup>

**Table 5:** Baseline characteristics according to high GPS<sub>Mult</sub>

|                                                | Bottom 80% GPS <sub>Mult</sub> | Top 20% GPS <sub>Mult</sub> |
|------------------------------------------------|--------------------------------|-----------------------------|
| Number of individuals                          | 224,292                        | 56,424                      |
| Prevalent coronary artery disease (%)          | 5,496 (2.5)                    | 4,155 (7.4)                 |
| Age, years (mean, SD)                          | 57.5 (7.9)                     | 57.2 (9.0)                  |
| Male sex (%)                                   | 102,639 (45.8)                 | 25,926 (45.9)               |
| Hypertension (%)                               | 58,635 (27.2)                  | 20,305 (37.9)               |
| Diabetes Mellitus (%)                          | 9,219 (4.1)                    | 4,653 (8.2)                 |
| *LDL cholesterol, mg/dL (mean (SD))            | 137.7 (33.0)                   | 140.5 (35.9)                |
| *HDL cholesterol, mg/dL (mean (SD))            | 57.0 (14.9)                    | 53.9 (14.3)                 |
| *Triglycerides, mg/dL (median [IQR])           | 129.4 [91.6, 186.8]            | 142.3 [100.7, 204.9]        |
| Current smoking (%)                            | 20,365 (9.1)                   | 5,866 (10.4)                |
| Family history of heart disease (%)            | 95,049 (42.4)                  | 29,936 (53.1)               |
| Body mass index, kg/m <sup>2</sup> (mean (SD)) | 27.2 (4.7)                     | 28.1 (5.0)                  |
| Lipid-lowering therapy (%)                     | 31,201 (13.9)                  | 13,892 (24.6)               |

Baseline characteristics according to high GPS<sub>Mult</sub> status, defined as the top 20% of the distribution empirically shown to be at  $\geq 3$ -fold risk of coronary artery disease. LDL: low-density lipoprotein; HDL: high-density lipoprotein. \*LDL-C, HDL-C, and triglyceride values were adjusted for cholesterol-lowering medication status, as previously described.<sup>17</sup>

**Table 6:** Performance of polygenic scores for CAD from Polygenic Score Catalog in the Million Veteran Program Study

| Score Name             | Identifier | Publication                                            | Beta  | SE    | P        | OR/SD [95% CI]   | Population |
|------------------------|------------|--------------------------------------------------------|-------|-------|----------|------------------|------------|
| GRS28                  | PGS000200  | Tikkanen E et al. Arterioscler Thromb Vasc Biol (2013) | 0.053 | 0.016 | 1.20E-03 | 1.05 (1.02-1.09) | AFR        |
| GRS27                  | PGS000010  | Mega JL et al. Lancet (2015)                           | 0.066 | 0.016 | 4.60E-05 | 1.07 (1.04-1.1)  | AFR        |
| GRS50                  | PGS000011  | Tada H et al. Eur Heart J (2015)                       | 0.073 | 0.016 | 6.30E-06 | 1.08 (1.04-1.11) | AFR        |
| GRS49K                 | PGS000012  | Abraham G et al. Eur Heart J (2016)                    | 0.082 | 0.016 | 4.70E-07 | 1.09 (1.05-1.12) | AFR        |
| CHD57                  | PGS000057  | Natarajan P et al. Circulation (2017)                  | 0.066 | 0.016 | 6.20E-05 | 1.07 (1.03-1.1)  | AFR        |
| GRS_CAD                | PGS000019  | Paquette M et al. J Clin Lipidol (2017)                | 0.115 | 0.016 | 2.60E-12 | 1.12 (1.09-1.16) | AFR        |
| GPS <sub>2018</sub>    | PGS000013  | Khera AV et al. Nat Genet (2018)                       | 0.128 | 0.016 | 3.10E-15 | 1.14 (1.1-1.17)  | AFR        |
| CAD_GRS_204            | PGS000058  | Morieri ML et al. Diabetes Care (2018)                 | 0.117 | 0.016 | 1.10E-12 | 1.12 (1.09-1.16) | AFR        |
| metaGRS_CAD            | PGS000018  | Inouye M et al. J Am Coll Cardiol (2018)               | 0.155 | 0.016 | 2.60E-21 | 1.17 (1.13-1.21) | AFR        |
| CHD46                  | PGS000059  | Hajek C et al. Circ Genom Precis Med (2018)            | 0.060 | 0.016 | 2.20E-04 | 1.06 (1.03-1.1)  | AFR        |
| 157SNP_GRS             | PGS000798  | Severance LM et al. J Cardiovasc Comput Tomogr (2019)  | 0.086 | 0.016 | 1.30E-07 | 1.09 (1.06-1.13) | AFR        |
| CAD_EJ2020             | PGS000116  | Elliott J et al. JAMA (2020)                           | 0.114 | 0.016 | 4.30E-12 | 1.12 (1.08-1.16) | AFR        |
| PRS_DE                 | PGS000748  | Gola D et al. Circ Genom Precis Med (2020)             | 0.118 | 0.016 | 3.20E-13 | 1.13 (1.09-1.16) | AFR        |
| PRS_COMBINED           | PGS000749  | Gola D et al. Circ Genom Precis Med (2020)             | 0.112 | 0.016 | 4.50E-12 | 1.12 (1.08-1.16) | AFR        |
| PRS_CHD                | PGS000329  | Mars N et al. Nat Med (2020)                           | 0.144 | 0.016 | 1.00E-18 | 1.15 (1.12-1.19) | AFR        |
| GPS_CAD_SA             | PGS000296  | Wang M et al. J Am Coll Cardiol (2020)                 | 0.158 | 0.016 | 2.50E-22 | 1.17 (1.13-1.21) | AFR        |
| PRS70_CAD              | PGS000349  | Pechlivanis S et al. BMC Med Genet (2020)              | 0.028 | 0.016 | 8.10E-02 | 1.03 (1-1.06)    | AFR        |
| MetaPRS <sub>CAD</sub> | PGS000337  | Koyama S et al. Nat Genet (2020)                       | 0.167 | 0.016 | 3.00E-24 | 1.18 (1.14-1.22) | AFR        |
| PRS176_CHD             | PGS000899  | Feitosa MF et al. Circ Genom Precis Med (2021)         | 0.109 | 0.016 | 3.40E-11 | 1.11 (1.08-1.15) | AFR        |

|                         |           |                                                        |       |       |           |                  |     |
|-------------------------|-----------|--------------------------------------------------------|-------|-------|-----------|------------------|-----|
| GRS_Metabo              | PGS000818 | Bauer A et al. Genet Epidemiol (2021)                  | 0.101 | 0.016 | 6.80E-10  | 1.11 (1.07-1.14) | AFR |
| AnnoPred <sub>CAD</sub> | PGS001355 | Ye Y et al. Circ Genom Precis Med (2021)               | 0.161 | 0.016 | 5.10E-23  | 1.18 (1.14-1.21) | AFR |
| portability-ldpred2     | PGS002048 | Prive F et al. Am J Hum Genet (2022)                   | 0.129 | 0.016 | 5.30E-15  | 1.14 (1.1-1.17)  | AFR |
| metaPRS_CAD             | PGS002262 | Lu X et al. Eur Heart J (2022)                         | 0.061 | 0.016 | 2.10E-04  | 1.06 (1.03-1.1)  | AFR |
| PRSCS <sub>CHD</sub>    | PGS001780 | Tamlander M et al. Commun Biol (2022)                  | 0.166 | 0.016 | 5.40E-24  | 1.18 (1.14-1.22) | AFR |
| GBE_HC942               | PGS000962 | Tanigawa Y et al. PLoS Genet (2022)                    | 0.088 | 0.016 | 6.60E-08  | 1.09 (1.06-1.13) | AFR |
| ldpred_cad              | PGS002244 | Mars N et al. Cell Genom (2022)                        | 0.139 | 0.016 | 1.70E-17  | 1.15 (1.11-1.19) | AFR |
| PRS_2022                | PGS003356 | Aragam KA et al. Nat Genet (2022)                      | 0.160 | 0.016 | 1.10E-22  | 1.17 (1.14-1.21) | AFR |
| GPSMult                 | -         | -                                                      | 0.222 | 0.016 | 2.20E-41  | 1.25 (1.21-1.29) | AFR |
| GRS28                   | PGS000200 | Tikkanen E et al. Arterioscler Thromb Vasc Biol (2013) | 0.185 | 0.007 | 7.50E-148 | 1.2 (1.19-1.22)  | EUR |
| GRS27                   | PGS000010 | Mega JL et al. Lancet (2015)                           | 0.214 | 0.007 | 4.40E-199 | 1.24 (1.22-1.26) | EUR |
| GRS50                   | PGS000011 | Tada H et al. Eur Heart J (2015)                       | 0.195 | 0.007 | 5.80E-163 | 1.21 (1.2-1.23)  | EUR |
| GRS49K                  | PGS000012 | Abraham G et al. Eur Heart J (2016)                    | 0.249 | 0.007 | 4.80E-262 | 1.28 (1.27-1.3)  | EUR |
| CHD57                   | PGS000057 | Natarajan P et al. Circulation (2017)                  | 0.118 | 0.007 | 8.80E-62  | 1.13 (1.11-1.14) | EUR |
| GRS_CAD                 | PGS000019 | Paquette M et al. J Clin Lipidol (2017)                | 0.273 | 0.007 | 1.1E-312  | 1.31 (1.3-1.33)  | EUR |
| GPS_CAD                 | PGS000013 | Khera AV et al. Nat Genet (2018)                       | 0.370 | 0.007 | 5.6E-551  | 1.45 (1.43-1.47) | EUR |
| CAD_GRS_204             | PGS000058 | Morieri ML et al. Diabetes Care (2018)                 | 0.326 | 0.007 | 8.4E-439  | 1.39 (1.37-1.41) | EUR |
| metaGRS_CAD             | PGS000018 | Inouye M et al. J Am Coll Cardiol (2018)               | 0.385 | 0.007 | 1.2E-593  | 1.47 (1.45-1.49) | EUR |
| CHD46                   | PGS000059 | Hajek C et al. Circ Genom Precis Med (2018)            | 0.165 | 0.007 | 1.00E-118 | 1.18 (1.16-1.2)  | EUR |
| 157SNP_GRS              | PGS000798 | Severance LM et al. J Cardiovasc Comput Tomogr (2019)  | 0.289 | 0.007 | 4.0E-347  | 1.33 (1.32-1.35) | EUR |
| CAD_EJ2020              | PGS000116 | Elliott J et al. JAMA (2020)                           | 0.295 | 0.007 | 6.0E-359  | 1.34 (1.32-1.36) | EUR |
| PRS_DE                  | PGS000748 | Gola D et al. Circ Genom Precis Med (2020)             | 0.273 | 0.007 | 3.1E-312  | 1.31 (1.3-1.33)  | EUR |

|                         |           |                                                        |       |       |           |                  |     |
|-------------------------|-----------|--------------------------------------------------------|-------|-------|-----------|------------------|-----|
| PRS_COMBINED            | PGS000749 | Gola D et al. Circ Genom Precis Med (2020)             | 0.275 | 0.007 | 2.9E-316  | 1.32 (1.3-1.33)  | EUR |
| PRS_CHD                 | PGS000329 | Mars N et al. Nat Med (2020)                           | 0.367 | 0.007 | 1.5E-551  | 1.44 (1.42-1.46) | EUR |
| GPS_CAD_SA              | PGS000296 | Wang M et al. J Am Coll Cardiol (2020)                 | 0.356 | 0.007 | 2.7E-515  | 1.43 (1.41-1.45) | EUR |
| PRS70_CAD               | PGS000349 | Pechlivanis S et al. BMC Med Genet (2020)              | 0.104 | 0.007 | 1.30E-48  | 1.11 (1.09-1.13) | EUR |
| MetaPRS <sub>CAD</sub>  | PGS000337 | Koyama S et al. Nat Genet (2020)                       | 0.418 | 0.007 | 1.5E-688  | 1.52 (1.5-1.54)  | EUR |
| PRS176_CHD              | PGS000899 | Feitosa MF et al. Circ Genom Precis Med (2021)         | 0.327 | 0.007 | 2.8E-441  | 1.39 (1.37-1.41) | EUR |
| GRS_Metabo              | PGS000818 | Bauer A et al. Genet Epidemiol (2021)                  | 0.258 | 0.007 | 1.80E-279 | 1.29 (1.28-1.31) | EUR |
| AnnoPred <sub>CAD</sub> | PGS001355 | Ye Y et al. Circ Genom Precis Med (2021)               | 0.383 | 0.007 | 7.3E-585  | 1.47 (1.45-1.49) | EUR |
| portability-ldpred2     | PGS002048 | Prive F et al. Am J Hum Genet (2022)                   | 0.379 | 0.007 | 2.0E-580  | 1.46 (1.44-1.48) | EUR |
| metaPRS_CAD             | PGS002262 | Lu X et al. Eur Heart J (2022)                         | 0.207 | 0.007 | 2.00E-182 | 1.23 (1.21-1.25) | EUR |
| PRSCS <sub>CHD</sub>    | PGS001780 | Tamlander M et al. Commun Biol (2022)                  | 0.372 | 0.007 | 3.9E-556  | 1.45 (1.43-1.47) | EUR |
| GBE_HC942               | PGS000962 | Tanigawa Y et al. PLoS Genet (2022)                    | 0.287 | 0.007 | 6.2E-345  | 1.33 (1.31-1.35) | EUR |
| ldpred_cad              | PGS002244 | Mars N et al. Cell Genom (2022)                        | 0.344 | 0.007 | 4.3E-482  | 1.41 (1.39-1.43) | EUR |
| PRS <sub>2022</sub>     | PGS003356 | Aragam KA et al. Nat Genet (2022)                      | 0.477 | 0.008 | 1.4E-874  | 1.61 (1.59-1.64) | EUR |
| GPS <sub>Mult</sub>     | -         | -                                                      | 0.542 | 0.008 | 1.1E-1085 | 1.72 (1.69-1.75) | EUR |
| GRS28                   | PGS000200 | Tikkanen E et al. Arterioscler Thromb Vasc Biol (2013) | 0.123 | 0.025 | 1.10E-06  | 1.13 (1.08-1.19) | HIS |
| GRS27                   | PGS000010 | Mega JL et al. Lancet (2015)                           | 0.147 | 0.025 | 5.70E-09  | 1.16 (1.1-1.22)  | HIS |
| GRS50                   | PGS000011 | Tada H et al. Eur Heart J (2015)                       | 0.136 | 0.025 | 8.20E-08  | 1.15 (1.09-1.2)  | HIS |
| GRS49K                  | PGS000012 | Abraham G et al. Eur Heart J (2016)                    | 0.217 | 0.025 | 1.40E-17  | 1.24 (1.18-1.31) | HIS |
| CHD57                   | PGS000057 | Natarajan P et al. Circulation (2017)                  | 0.127 | 0.025 | 5.10E-07  | 1.14 (1.08-1.19) | HIS |
| GRS_CAD                 | PGS000019 | Paquette M et al. J Clin Lipidol (2017)                | 0.236 | 0.025 | 9.70E-21  | 1.27 (1.2-1.33)  | HIS |
| GPS <sub>2018</sub>     | PGS000013 | Khera AV et al. Nat Genet (2018)                       | 0.286 | 0.026 | 9.50E-29  | 1.33 (1.27-1.4)  | HIS |

|                         |           |                                                       |       |       |          |                  |     |
|-------------------------|-----------|-------------------------------------------------------|-------|-------|----------|------------------|-----|
| CAD_GRS_204             | PGS000058 | Morieri ML et al. Diabetes Care (2018)                | 0.286 | 0.026 | 6.60E-29 | 1.33 (1.27-1.4)  | HIS |
| metaGRS_CAD             | PGS000018 | Inouye M et al. J Am Coll Cardiol (2018)              | 0.320 | 0.025 | 2.90E-36 | 1.38 (1.31-1.45) | HIS |
| CHD46                   | PGS000059 | Hajek C et al. Circ Genom Precis Med (2018)           | 0.159 | 0.025 | 3.50E-10 | 1.17 (1.12-1.23) | HIS |
| 157SNP_GRS              | PGS000798 | Severance LM et al. J Cardiovasc Comput Tomogr (2019) | 0.244 | 0.025 | 9.10E-22 | 1.28 (1.21-1.34) | HIS |
| CAD_EJ2020              | PGS000116 | Elliott J et al. JAMA (2020)                          | 0.251 | 0.026 | 1.10E-22 | 1.29 (1.22-1.35) | HIS |
| PRS_DE                  | PGS000748 | Gola D et al. Circ Genom Precis Med (2020)            | 0.254 | 0.025 | 9.80E-24 | 1.29 (1.23-1.36) | HIS |
| PRS_COMBINED            | PGS000749 | Gola D et al. Circ Genom Precis Med (2020)            | 0.238 | 0.025 | 4.40E-21 | 1.27 (1.21-1.33) | HIS |
| PRS_CHD                 | PGS000329 | Mars N et al. Nat Med (2020)                          | 0.285 | 0.025 | 4.50E-29 | 1.33 (1.27-1.4)  | HIS |
| GPS_CAD_SA              | PGS000296 | Wang M et al. J Am Coll Cardiol (2020)                | 0.291 | 0.026 | 4.50E-30 | 1.34 (1.27-1.41) | HIS |
| PRS70_CAD               | PGS000349 | Pechlivanis S et al. BMC Med Genet (2020)             | 0.091 | 0.025 | 2.90E-04 | 1.1 (1.04-1.15)  | HIS |
| MetaPRS <sub>CAD</sub>  | PGS000337 | Koyama S et al. Nat Genet (2020)                      | 0.398 | 0.026 | 2.30E-52 | 1.49 (1.41-1.57) | HIS |
| PRS176_CHD              | PGS000899 | Feitosa MF et al. Circ Genom Precis Med (2021)        | 0.280 | 0.026 | 6.30E-28 | 1.32 (1.26-1.39) | HIS |
| GRS_Metabo              | PGS000818 | Bauer A et al. Genet Epidemiol (2021)                 | 0.218 | 0.025 | 1.40E-17 | 1.24 (1.18-1.31) | HIS |
| AnnoPred <sub>CAD</sub> | PGS001355 | Ye Y et al. Circ Genom Precis Med (2021)              | 0.349 | 0.026 | 1.10E-41 | 1.42 (1.35-1.49) | HIS |
| portability-ldpred2     | PGS002048 | Prive F et al. Am J Hum Genet (2022)                  | 0.337 | 0.026 | 2.40E-39 | 1.4 (1.33-1.47)  | HIS |
| metaPRS_CAD             | PGS002262 | Lu X et al. Eur Heart J (2022)                        | 0.202 | 0.025 | 2.60E-15 | 1.22 (1.16-1.29) | HIS |
| PRSCS <sub>CHD</sub>    | PGS001780 | Tamlander M et al. Commun Biol (2022)                 | 0.330 | 0.026 | 1.50E-37 | 1.39 (1.32-1.46) | HIS |
| GBE_HC942               | PGS000962 | Tanigawa Y et al. PLoS Genet (2022)                   | 0.222 | 0.025 | 2.30E-18 | 1.25 (1.19-1.31) | HIS |
| ldpred_cad              | PGS002244 | Mars N et al. Cell Genom (2022)                       | 0.269 | 0.026 | 4.60E-26 | 1.31 (1.25-1.38) | HIS |
| PRS_2022                | PGS003356 | Aragam KA et al. Nat Genet (2022)                     | 0.418 | 0.026 | 1.40E-57 | 1.52 (1.44-1.6)  | HIS |
| GPSMult                 | -         | -                                                     | 0.477 | 0.027 | 5.10E-72 | 1.61 (1.53-1.7)  | HIS |

The odds ratio for prevalent coronary artery disease (CAD) risk per standard deviation (OR/SD) of the polygenic score and 95% confidence interval were validated in a logistic regression model adjusted for age, sex, genotyping array, and the first ten principal components of ancestry

in a holdout cohort of individuals of the Million Veteran Project using prior published scores from the Polygenic Score Catalog. *P* values are derived from a *t*-test implemented in the GLM function in R and are two-sided. Beta: Effect size from logistic regression; SE: standard error. AFR: African ancestry; EUR: European ancestry; HISP: Hispanic ancestry.



**Table 7:** Performance of polygenic scores for CAD from Polygenic Score Catalog in the Genes & Health Study

| Score Name             | Identifier | Publication                                            | Beta  | SE    | P        | OR/SD [95% CI]   | Population |
|------------------------|------------|--------------------------------------------------------|-------|-------|----------|------------------|------------|
| GRS28                  | PGS000200  | Tikkanen E et al. Arterioscler Thromb Vasc Biol (2013) | 0.169 | 0.040 | 2.40E-05 | 1.18 [1.09-1.28] | SAS        |
| GRS27                  | PGS000010  | Mega JL et al. Lancet (2015)                           | 0.159 | 0.040 | 6.79E-05 | 1.17 [1.08-1.27] | SAS        |
| GRS50                  | PGS000011  | Tada H et al. Eur Heart J (2015)                       | 0.108 | 0.039 | 5.91E-03 | 1.11 [1.03-1.2]  | SAS        |
| GRS49K                 | PGS000012  | Abraham G et al. Eur Heart J (2016)                    | 0.288 | 0.044 | 4.38E-11 | 1.33 [1.22-1.45] | SAS        |
| CHD57                  | PGS000057  | Natarajan P et al. Circulation (2017)                  | 0.105 | 0.040 | 9.17E-03 | 1.11 [1.03-1.2]  | SAS        |
| GRS_CAD                | PGS000019  | Paquette M et al. J Clin Lipidol (2017)                | 0.218 | 0.040 | 4.99E-08 | 1.24 [1.15-1.34] | SAS        |
| GPS <sub>2018</sub>    | PGS000013  | Khera AV et al. Nat Genet (2018)                       | 0.285 | 0.042 | 7.74E-12 | 1.33 [1.23-1.44] | SAS        |
| CAD_GRS_204            | PGS000058  | Morieri ML et al. Diabetes Care (2018)                 | 0.229 | 0.040 | 1.23E-08 | 1.26 [1.16-1.36] | SAS        |
| metaGRS_CAD            | PGS000018  | Inouye M et al. J Am Coll Cardiol (2018)               | 0.327 | 0.044 | 9.81E-14 | 1.39 [1.27-1.51] | SAS        |
| CHD46                  | PGS000059  | Hajek C et al. Circ Genom Precis Med (2018)            | 0.111 | 0.040 | 5.83E-03 | 1.12 [1.03-1.21] | SAS        |
| 157SNP_GRS             | PGS000798  | Severance LM et al. J Cardiovasc Comput Tomogr (2019)  | 0.244 | 0.041 | 2.07E-09 | 1.28 [1.18-1.38] | SAS        |
| CAD_EJ2020             | PGS000116  | Elliott J et al. JAMA (2020)                           | 0.327 | 0.042 | 4.18E-15 | 1.39 [1.28-1.5]  | SAS        |
| PRS_COMBINED           | PGS000749  | Gola D et al. Circ Genom Precis Med (2020)             | 0.328 | 0.041 | 2.26E-15 | 1.39 [1.28-1.51] | SAS        |
| PRS_DE                 | PGS000748  | Gola D et al. Circ Genom Precis Med (2020)             | 0.306 | 0.041 | 1.13E-13 | 1.36 [1.25-1.47] | SAS        |
| PRS_CHD                | PGS000329  | Mars N et al. Nat Med (2020)                           | 0.310 | 0.041 | 2.26E-14 | 1.36 [1.26-1.48] | SAS        |
| GPS_CAD_SA             | PGS000296  | Wang M et al. J Am Coll Cardiol (2020)                 | 0.338 | 0.041 | 3.57E-16 | 1.4 [1.29-1.52]  | SAS        |
| PRS70_CAD              | PGS000349  | Pechlivanis S et al. BMC Med Genet (2020)              | 0.072 | 0.040 | 6.87E-02 | 1.08 [0.99-1.16] | SAS        |
| MetaPRS <sub>CAD</sub> | PGS000337  | Koyama S et al. Nat Genet (2020)                       | 0.428 | 0.042 | 1.17E-24 | 1.53 [1.41-1.67] | SAS        |
| PRS176_CHD             | PGS000899  | Feitosa MF et al. Circ Genom Precis Med (2021)         | 0.251 | 0.041 | 5.86E-10 | 1.29 [1.19-1.39] | SAS        |
| GRS_Metabo             | PGS000818  | Bauer A et al. Genet Epidemiol (2021)                  | 0.209 | 0.040 | 2.13E-07 | 1.23 [1.14-1.33] | SAS        |

|                      |           |                                                    |       |       |          |                  |     |
|----------------------|-----------|----------------------------------------------------|-------|-------|----------|------------------|-----|
| CAD_AnnoPred         | PGS001355 | Ye Y et al. Circ Genom Precis Med (2021)           | 0.352 | 0.041 | 1.71E-17 | 1.42 [1.31-1.54] | SAS |
| portability-ldpred2  | PGS002048 | Priv <sup>√</sup> © F et al. Am J Hum Genet (2022) | 0.380 | 0.041 | 4.53E-20 | 1.46 [1.35-1.59] | SAS |
| metaPRS_CAD          | PGS002262 | Lu X et al. Eur Heart J (2022)                     | 0.193 | 0.041 | 6.24E-06 | 1.21 [1.12-1.31] | SAS |
| PRSCS <sub>CHD</sub> | PGS001780 | Tamlander M et al. Commun Biol (2022)              | 0.420 | 0.042 | 3.64E-23 | 1.52 [1.4-1.65]  | SAS |
| GBE_HC942            | PGS000962 | Tanigawa Y et al. PLoS Genet (2022)                | 0.180 | 0.040 | 2.69E-06 | 1.2 [1.11-1.29]  | SAS |
| ldpred_cad           | PGS002244 | Mars N et al. Cell Genom (2022)                    | 0.301 | 0.042 | 4.13E-13 | 1.35 [1.25-1.47] | SAS |
| PRS <sub>2022</sub>  | PGS003356 | Aragam KA et al. Nat Genet (2022)                  | 0.469 | 0.042 | 1.37E-29 | 1.6 [1.47-1.73]  | SAS |
| GPS <sub>Mult</sub>  | -         | -                                                  | 0.606 | 0.042 | 1.95E-47 | 1.83 [1.69-1.99] | SAS |

The odds ratio for prevalent coronary artery disease (CAD) risk per standard deviation (OR/SD) of the polygenic score and 95% confidence interval were validated in a logistic regression model adjusted for age, sex, genotyping array, and the first ten principal components of ancestry in a holdout cohort of individuals of the Genes & Health study using prior published scores from the Polygenic Score Catalog. *P* values are derived from a *t*-test implemented in the GLM function in R and are two-sided. Beta: Effect size from logistic regression; SE: standard error. SAS: South Asian ancestry.

**Table 8:** Model C-statistics by ancestry in the UK Biobank Study

| <b>Ancestry</b>                                            | <b>All</b>          | <b>African</b>      | <b>East Asian</b>   | <b>European</b>     | <b>South Asian</b>  |
|------------------------------------------------------------|---------------------|---------------------|---------------------|---------------------|---------------------|
| <b>Age+Sex</b>                                             | 0.71 (0.706-0.715)  | 0.708 (0.666-0.75)  | 0.775 (0.694-0.856) | 0.708 (0.703-0.712) | 0.712 (0.692-0.732) |
| <b>PCE</b>                                                 | 0.739 (0.735-0.744) | 0.749 (0.707-0.791) | 0.803 (0.71-0.895)  | 0.739 (0.734-0.743) | 0.739 (0.717-0.76)  |
| <b>PCE+GPS<sub>Mult</sub>+PCE*GPS<sub>Mult</sub></b>       | 0.763 (0.759-0.768) | 0.753 (0.712-0.794) | 0.882 (0.843-0.921) | 0.762 (0.758-0.767) | 0.764 (0.743-0.784) |
| <b>QRISK3</b>                                              | 0.746 (0.741-0.75)  | 0.747 (0.698-0.796) | 0.811 (0.73-0.893)  | 0.744 (0.74-0.749)  | 0.745 (0.722-0.769) |
| <b>QRISK3+GPS<sub>Mult</sub>+QRISK3*GPS<sub>Mult</sub></b> | 0.769 (0.764-0.773) | 0.759 (0.712-0.806) | 0.882 (0.834-0.929) | 0.768 (0.763-0.772) | 0.777 (0.756-0.799) |

C-statistics stratified by ancestry are based on 10-year follow-up events from Cox regression models of listed variables, the first ten principal components of genetic ancestry, and genotyping array. ACC/AHA Pooled Cohort Equations (PCE) and QISK3 10-year risk estimates include age and sex variables in their risk estimation.

**Table 9:** Model net reclassification by ancestry in the UK Biobank Study

| NRI         |        | Status   | All                         | African               | East Asian            | European              | South Asian              |
|-------------|--------|----------|-----------------------------|-----------------------|-----------------------|-----------------------|--------------------------|
| Categorical | PCE    | Full     | 0.070 (0.059-0.082)         | 0.010 (-0.016-0.035)  | 0.000 (-0.008-0.176)  | 0.073 (0.063-0.081)   | 0.067 (0.019-0.147)      |
|             |        | Cases    | 0.081 (0.069-0.094)         | 0.010 (-0.016-0.034)  | 0.000 (0.000-0.179)   | 0.083 (0.074-0.092)   | 0.102 (0.043-0.188)      |
|             |        | Noncases | -0.011<br>(-0.012 - -0.009) | 0.00 (-0.003-0.002)   | 0.000 (-0.008-0.003)  | -0.011 (-0.012-0.009) | -0.035<br>(-0.053-0.018) |
|             | QRISK3 | Full     | 0.034 (0.028-0.040)         | 0.011 (-0.014-0.058)  | -0.001 (-0.003-0.002) | 0.036 (0.029-0.044)   | 0.025 (-0.011-0.101)     |
|             |        | Cases    | 0.038 (0.032-0.045)         | 0.012 (-0.012-0.059)  | 0.000 (0.000-0.000)   | 0.040 (0.033-0.049)   | 0.035 (-0.004-0.124)     |
|             |        | Noncases | -0.004<br>(-0.005 - -0.003) | -0.001 (-0.003-0.001) | -0.001 (-0.003-0.002) | -0.005 (-0.006-0.004) | -0.011<br>(-0.023-0.003) |
| Continuous  | PCE    | Full     | 0.405 (0.379-0.424)         | 0.057 (-0.211-0.291)  | 0.427 (-0.249-0.849)  | 0.412 (0.388-0.431)   | 0.366 (0.269-0.463)      |
|             |        | Cases    | 0.200 (0.182-0.215)         | -0.026 (-0.245-0.184) | 0.285 (-0.402-0.599)  | 0.206 (0.186-0.221)   | 0.175 (0.104-0.257)      |
|             |        | Noncases | 0.205 (0.197-0.213)         | 0.084 (-0.012-0.183)  | 0.142 (-0.007-0.347)  | 0.207 (0.195-0.217)   | 0.191 (0.158-0.233)      |
|             | QRISK3 | Full     | 0.395 (0.373-0.418)         | 0.173 (-0.207-0.673)  | 0.300 (-0.338-0.780)  | 0.403 (0.377-0.426)   | 0.355 (0.232-0.456)      |
|             |        | Cases    | 0.195 (0.177-0.214)         | 0.059 (-0.165-0.443)  | 0.164 (-0.496-0.594)  | 0.201 (0.183-0.218)   | 0.173 (0.073-0.246)      |
|             |        | Noncases | 0.200 (0.192-0.210)         | 0.114 (-0.013-0.406)  | 0.137 (-0.015-0.383)  | 0.202 (0.193-0.210)   | 0.183 (0.138-0.243)      |

The improvement in the predictive performance of the addition of the  $GPS_{Mult}$  to the ACC/AHA Pooled Cohort Equations (PCE) or QRISK3 was evaluated in each ancestry using continuous and categorised net reclassification improvement (NRI), with a risk probabilities threshold of 7.5% obtained with Kaplan-Meier estimates for a period of 10 years and confidence intervals (95%) obtained from 100-fold bootstrapping.

## References:

1. Aragam, K. G. *et al.* Discovery and systematic characterization of risk variants and genes for coronary artery disease in over a million participants. 2021.05.24.21257377 Preprint at <https://doi.org/10.1101/2021.05.24.21257377> (2021).
2. Sakaue, S. *et al.* A cross-population atlas of genetic associations for 220 human phenotypes. *Nat Genet* **53**, 1415–1424 (2021).
3. Huang, Q. Q. *et al.* Transferability of genetic loci and polygenic scores for cardiometabolic traits in British Pakistani and Bangladeshi individuals. *Nat Commun* **13**, 4664 (2022).
4. Kurki, M. I. *et al.* FinnGen: Unique genetic insights from combining isolated population and national health register data. 2022.03.03.22271360 Preprint at <https://doi.org/10.1101/2022.03.03.22271360> (2022).
5. Tcheandjieu, C. *et al.* Large-scale genome-wide association study of coronary artery disease in genetically diverse populations. *Nat Med* 1–13 (2022) doi:10.1038/s41591-022-01891-3.
6. Locke, A. E. *et al.* Genetic studies of body mass index yield new insights for obesity biology. *Nature* **518**, 197–206 (2015).
7. Evangelou, E. *et al.* Genetic analysis of over 1 million people identifies 535 new loci associated with blood pressure traits. *Nat Genet* **50**, 1412–1425 (2018).
8. Vujkovic, M. *et al.* Discovery of 318 new risk loci for type 2 diabetes and related vascular outcomes among 1.4 million participants in a multi-ancestry meta-analysis. *Nat Genet* **52**, 680–691 (2020).
9. Spracklen, C. N. *et al.* Identification of type 2 diabetes loci in 433,540 East Asian individuals. *Nature* **582**, 240–245 (2020).
10. Hodgson, S. *et al.* Harnessing the power of polygenic risk scores to predict type 2 diabetes and its subtypes in a high-risk population of British Pakistanis and Bangladeshis in a routine healthcare setting. 2021.07.12.21259837 Preprint at <https://doi.org/10.1101/2021.07.12.21259837> (2021).
11. Graham, S. E. *et al.* The power of genetic diversity in genome-wide association studies of lipids. *Nature* **600**, 675–679 (2021).
12. Klarin, D. *et al.* Genetics of blood lipids among ~300,000 multi-ethnic participants of the Million Veteran Program. *Nat Genet* **50**, 1514–1523 (2018).
13. Klarin, D. *et al.* Genome-wide Association Study of Peripheral Artery Disease in the Million Veteran Program. *Nat Med* **25**, 1274–1279 (2019).
14. Malik, R. *et al.* Multiancestry genome-wide association study of 520,000 subjects identifies 32 loci associated with stroke and stroke subtypes. *Nat Genet* **50**, 524–537 (2018).
15. Zhou, W. *et al.* Global Biobank Meta-analysis Initiative: powering genetic discovery across human diseases. 2021.11.19.21266436 Preprint at <https://doi.org/10.1101/2021.11.19.21266436> (2021).
16. Hellwege, JN *et al.* Mapping eGFR loci to the renal transcriptome and phenome in the VA Million Veteran Program. *Nat Commun*. **10**(1):3842 (2019).
17. Patel, A. P. *et al.* Association of Rare Pathogenic DNA Variants for Familial Hypercholesterolemia, Hereditary Breast and Ovarian Cancer Syndrome, and Lynch Syndrome With Disease Risk in Adults According to Family History. *JAMA Netw Open* **3**, e203959 (2020).

18. Patel, A. P., Wang, M., Kartoun, U., Ng, K. & Khera, A. V. Quantifying and Understanding the Higher Risk of Atherosclerotic Cardiovascular Disease Among South Asian Individuals. *Circulation* **144**, 410–422 (2021).
19. Lee, S. H., Goddard, M. E., Wray, N. R. & Visscher, P. M. A better coefficient of determination for genetic profile analysis. *Genet Epidemiol* **36**, 214–224 (2012).
20. Khera, A. V. *et al.* Genome-wide polygenic scores for common diseases identify individuals with risk equivalent to monogenic mutations. *Nat. Genet.* **50**, 1219–1224 (2018).
21. Goff David C. *et al.* 2013 ACC/AHA Guideline on the Assessment of Cardiovascular Risk. *Circulation* **129**, S49–S73 (2014).

## **Genes & Health Study Acknowledgements**

Current Genes & Health Research Team (in alphabetical order by surname): Shaheen Akhtar, Mohammad Anwar, Elena Arciero, Omar Asgar, Samina Ashraf, Saeed Bidi, Gerome Breen, James Broster, Raymond Chung, David Collier, Charles J Curtis, Shabana Chaudhary, Megan Clinch, Grainne Colligan, Panos Deloukas, Ceri Durham, Faiza Durrani, Fabiola Eto, Sarah Finer, Joseph Gafton, Ana Angel Garcia, Chris Griffiths, Joanne Harvey, Teng Heng, Sam Hodgson, Qin Qin Huang, Matt Hurles, Karen A Hunt, Shapna Hussain, Kamrul Islam, Vivek Iyer, Ben Jacobs, Ahsan Khan, Cath Lavery, Sang Hyuck Lee, Robin Lerner, Daniel MacArthur, Daniel Malawsky, Hilary Martin, Dan Mason, Rohini Mathur, Mohammed Bodrul Mazid, John McDermott, Caroline Morton, Bill Newman, Elizabeth Owor, Asma Qureshi, Samiha Rahman, Shwetha Ramachandrappa, Mehru Reza, Jessry Russell, Nishat Safa, Miriam Samuel, Michael Simpson, John Solly, Marie Spreckley. Daniel Stow, Michael Taylor, Richard C Trembath, Karen Tricker, Nasir Uddin, David A van Heel, Klaudia Walter, Caroline Winckley, Suzanne Wood, John Wright, Julia Zollner.

## **VA Million Veteran Program:**

### **MVP Program Office**

- Sumitra Muralidhar, Ph.D., Program Director  
US Department of Veterans Affairs, 810 Vermont Avenue NW, Washington, DC 20420
- Jennifer Moser, Ph.D., Associate Director, Scientific Programs  
US Department of Veterans Affairs, 810 Vermont Avenue NW, Washington, DC 20420
- Jennifer E. Deen, B.S., Associate Director, Cohort & Public Relations  
US Department of Veterans Affairs, 810 Vermont Avenue NW, Washington, DC 20420

### **MVP Executive Committee**

- Co-Chair: Philip S. Tsao, Ph.D.  
VA Palo Alto Health Care System, 3801 Miranda Avenue, Palo Alto, CA 94304
- Co-Chair: Sumitra Muralidhar, Ph.D.  
US Department of Veterans Affairs, 810 Vermont Avenue NW, Washington, DC 20420
- J. Michael Gaziano, M.D., M.P.H.  
VA Boston Healthcare System, 150 S. Huntington Avenue, Boston, MA 02130
- Elizabeth Hauser, Ph.D.  
Durham VA Medical Center, 508 Fulton Street, Durham, NC 27705
- Amy Kilbourne, Ph.D., M.P.H.  
VA HSR&D, 2215 Fuller Road, Ann Arbor, MI 48105
- Shih-Wen Luoh, M.D., Ph.D.  
VA Portland Health Care System, 3710 SW US Veterans Hospital Rd, Portland, OR 97239
- Michael Matheny, M.D., M.S., M.P.H.  
VA Tennessee Valley Healthcare System, 1310 24<sup>th</sup> Ave. South, Nashville, TN 37212
- Dave Oslin, M.D.  
Philadelphia VA Medical Center, 3900 Woodland Avenue, Philadelphia, PA 19104

### **MVP Co-Principal Investigators**

- J. Michael Gaziano, M.D., M.P.H.  
VA Boston Healthcare System, 150 S. Huntington Avenue, Boston, MA 02130
- Philip S. Tsao, Ph.D.  
VA Palo Alto Health Care System, 3801 Miranda Avenue, Palo Alto, CA 94304

### **MVP Core Operations**

- Lori Churby, B.S., Director, MVP Regulatory Affairs  
VA Palo Alto Health Care System, 3801 Miranda Avenue, Palo Alto, CA 94304
- Stacey B. Whitbourne, Ph.D., Director, MVP Cohort Management  
VA Boston Healthcare System, 150 S. Huntington Avenue, Boston, MA 02130
- Jessica V. Brewer, M.P.H., Director, MVP Recruitment & Enrollment  
VA Boston Healthcare System, 150 S. Huntington Avenue, Boston, MA 02130
- Shahpoor (Alex) Shayan, M.S., Director, MVP Recruitment and Enrollment Informatics  
VA Boston Healthcare System, 150 S. Huntington Avenue, Boston, MA 02130
- Luis E. Selva, Ph.D., Executive Director, MVP Biorepositories



- VA Boston Healthcare System, 150 S. Huntington Avenue, Boston, MA 02130
- Saiju Pyarajan Ph.D., Director, Data and Computational Sciences  
VA Boston Healthcare System, 150 S. Huntington Avenue, Boston, MA 02130
- Kelly Cho, M.P.H, Ph.D., Director, MVP Phenomics Data Core  
VA Boston Healthcare System, 150 S. Huntington Avenue, Boston, MA 02130
- Scott L. DuVall, Ph.D., Director, VA Informatics and Computing Infrastructure (VINCI)  
VA Salt Lake City Health Care System, 500 Foothill Drive, Salt Lake City, UT 84148
- Mary T. Brophy M.D., M.P.H., Director, VA Central Biorepository  
VA Boston Healthcare System, 150 S. Huntington Avenue, Boston, MA 02130
- MVP Coordinating Centers
  - o MVP Coordinating Center, Boston - J. Michael Gaziano, M.D., M.P.H.  
VA Boston Healthcare System, 150 S. Huntington Avenue, Boston, MA 02130
  - o MVP Coordinating Center, Palo Alto – Philip S. Tsao, Ph.D.  
VA Palo Alto Health Care System, 3801 Miranda Avenue, Palo Alto, CA 94304
  - o MVP Information Center, Canandaigua – Brady Stephens, M.S.  
Canandaigua VA Medical Center, 400 Fort Hill Avenue, Canandaigua, NY 14424
  - o Cooperative Studies Program Clinical Research Pharmacy Coordinating Center, Albuquerque – Todd Connor, Pharm.D.; Dean P. Argyres, B.S., M.S.  
New Mexico VA Health Care System, 1501 San Pedro Drive SE, Albuquerque, NM 87108

#### **MVP Publications and Presentations Committee**

- Co-Chair: Tim Assimes, M.D.  
VA Palo Alto Health Care System, 3801 Miranda Avenue, Palo Alto, CA 94304
- Co-Chair: Adriana Hung, M.D.  
VA Tennessee Valley Healthcare System, 1310 24<sup>th</sup> Ave. South, Nashville, TN 37212
- Co-Chair: Henry Kranzler, M.D.  
Philadelphia VA Medical Center, 3900 Woodland Avenue, Philadelphia, PA 19104

#### **MVP Local Site Investigators**

- Samuel Aguayo, M.D., Phoenix VA Health Care System  
650 E. Indian School Road, Phoenix, AZ 85012
- Sunil Ahuja, M.D., South Texas Veterans Health Care System  
7400 Merton Minter Boulevard, San Antonio, TX 78229
- Kathrina Alexander, M.D., Veterans Health Care System of the Ozarks  
1100 North College Avenue, Fayetteville, AR 72703
- Xiao M. Androulakis, M.D., Columbia VA Health Care System  
6439 Garners Ferry Road, Columbia, SC 29209
- Prakash Balasubramanian, M.D., William S. Middleton Memorial Veterans Hospital  
2500 Overlook Terrace, Madison, WI 53705
- Zuhair Ballas, M.D., Iowa City VA Health Care System  
601 Highway 6 West, Iowa City, IA 52246-2208
- Jean Beckham, Ph.D., Durham VA Medical Center  
508 Fulton Street, Durham, NC 27705
- Sujata Bhushan, M.D., VA North Texas Health Care System  
4500 S. Lancaster Road, Dallas, TX 75216
- Edward Boyko, M.D., VA Puget Sound Health Care System  
1660 S. Columbian Way, Seattle, WA 98108-1597
- David Cohen, M.D., Portland VA Medical Center  
3710 SW U.S. Veterans Hospital Road, Portland, OR 97239

- Louis Dellitalia, M.D., Birmingham VA Medical Center  
700 S. 19th Street, Birmingham AL 35233
- L. Christine Faulk, M.D., Robert J. Dole VA Medical Center  
5500 East Kellogg Drive, Wichita, KS 67218-1607
- Joseph Fayad, M.D., VA Southern Nevada Healthcare System  
6900 North Pecos Road, North Las Vegas, NV 89086
- Daryl Fujii, Ph.D., VA Pacific Islands Health Care System  
459 Patterson Rd, Honolulu, HI 96819
- Saib Gappy, M.D., John D. Dingell VA Medical Center  
4646 John R Street, Detroit, MI 48201
- Frank Gesek, Ph.D., White River Junction VA Medical Center  
163 Veterans Drive, White River Junction, VT 05009
- Jennifer Greco, M.D., Sioux Falls VA Health Care System  
2501 W 22nd Street, Sioux Falls, SD 57105
- Michael Godschalk, M.D., Richmond VA Medical Center  
1201 Broad Rock Blvd., Richmond, VA 23249
- Todd W. Gress, M.D., Ph.D., Hershel "Woody" Williams VA Medical Center  
1540 Spring Valley Drive, Huntington, WV 25704
- Samir Gupta, M.D., M.S.C.S., VA San Diego Healthcare System  
3350 La Jolla Village Drive, San Diego, CA 92161
- Salvador Gutierrez, M.D., Edward Hines, Jr. VA Medical Center  
5000 South 5th Avenue, Hines, IL 60141
- John Harley, M.D., Ph.D., Cincinnati VA Medical Center  
3200 Vine Street, Cincinnati, OH 45220
- Kimberly Hammer, Ph.D., Fargo VA Health Care System  
2101 N. Elm, Fargo, ND 58102
- Mark Hamner, M.D., Ralph H. Johnson VA Medical Center  
109 Bee Street, Mental Health Research, Charleston, SC 29401
- Adriana Hung, M.D., M.P.H., VA Tennessee Valley Healthcare System  
1310 24th Avenue, South Nashville, TN 37212
- Robin Hurley, M.D., W.G. (Bill) Hefner VA Medical Center  
1601 Brenner Ave, Salisbury, NC 28144
- Pran Iruvanti, D.O., Ph.D., Hampton VA Medical Center  
100 Emancipation Drive, Hampton, VA 23667
- Frank Jacono, M.D., VA Northeast Ohio Healthcare System  
10701 East Boulevard, Cleveland, OH 44106
- Darshana Jhala, M.D., Philadelphia VA Medical Center  
3900 Woodland Avenue, Philadelphia, PA 19104
- Scott Kinlay, M.B.B.S., Ph.D., VA Boston Healthcare System  
150 S. Huntington Avenue, Boston, MA 02130
- Jon Klein, M.D., Ph.D., Louisville VA Medical Center  
800 Zorn Avenue, Louisville, KY 40206
- Michael Landry, Ph.D., Southeast Louisiana Veterans Health Care System  
2400 Canal Street, New Orleans, LA 70119
- Peter Liang, M.D., M.P.H., VA New York Harbor Healthcare System  
423 East 23rd Street, New York, NY 10010
- Suthat Liangpunsakul, M.D., M.P.H., Richard Roudebush VA Medical Center  
1481 West 10th Street, Indianapolis, IN 46202
- Jack Lichy, M.D., Ph.D., Washington DC VA Medical Center  
50 Irving St, Washington, D. C. 20422
- C. Scott Mahan, M.D., Charles George VA Medical Center  
1100 Tunnel Road, Asheville, NC 28805
- Ronnie Marrache, M.D., VA Maine Healthcare System  
1 VA Center, Augusta, ME 04330

- Stephen Mastorides, M.D., James A. Haley Veterans' Hospital  
13000 Bruce B. Downs Blvd, Tampa, FL 33612
- Elisabeth Mates M.D., Ph.D., VA Sierra Nevada Health Care System  
975 Kirman Avenue, Reno, NV 89502
- Kristin Mattocks, Ph.D., M.P.H., Central Western Massachusetts Healthcare System  
421 North Main Street, Leeds, MA 01053
- Paul Meyer, M.D., Ph.D., Southern Arizona VA Health Care System  
3601 S 6th Avenue, Tucson, AZ 85723
- Jonathan Moorman, M.D., Ph.D., James H. Quillen VA Medical Center  
Corner of Lamont & Veterans Way, Mountain Home, TN 37684
- Timothy Morgan, M.D., VA Long Beach Healthcare System  
5901 East 7th Street Long Beach, CA 90822
- Maureen Murdoch, M.D., M.P.H., Minneapolis VA Health Care System  
One Veterans Drive, Minneapolis, MN 55417
- James Norton, Ph.D., VA Health Care Upstate New York  
113 Holland Avenue, Albany, NY 12208
- Olaoluwa Okusaga, M.D., Michael E. DeBakey VA Medical Center  
2002 Holcombe Blvd, Houston, TX 77030
- Kris Ann Oursler, M.D., Salem VA Medical Center  
1970 Roanoke Blvd, Salem, VA 24153
- Ana Palacio, M.D., M.P.H., Miami VA Health Care System  
1201 NW 16th Street, 11 GRC, Miami FL 33125
- Samuel Poon, M.D., Manchester VA Medical Center  
718 Smyth Road, Manchester, NH 03104
- Emily Potter, Pharm.D., VA Eastern Kansas Health Care System  
4101 S 4th Street Trafficway, Leavenworth, KS 66048
- Michael Rauchman, M.D., St. Louis VA Health Care System  
915 North Grand Blvd, St. Louis, MO 63106
- Richard Servatius, Ph.D., Syracuse VA Medical Center  
800 Irving Avenue, Syracuse, NY 13210
- Satish Sharma, M.D., Providence VA Medical Center  
830 Chalkstone Avenue, Providence, RI 02908
- River Smith, Ph.D., Eastern Oklahoma VA Health Care System  
1011 Honor Heights Drive, Muskogee, OK 74401
- Peruvemba Sriram, M.D., N. FL/S. GA Veterans Health System  
1601 SW Archer Road, Gainesville, FL 32608
- Patrick Strollo, Jr., M.D., VA Pittsburgh Health Care System  
University Drive, Pittsburgh, PA 15240
- Neeraj Tandon, M.D., Overton Brooks VA Medical Center  
510 East Stoner Ave, Shreveport, LA 71101
- Philip Tsao, Ph.D., VA Palo Alto Health Care System  
3801 Miranda Avenue, Palo Alto, CA 94304-1290
- Gerardo Villareal, M.D., New Mexico VA Health Care System  
1501 San Pedro Drive, S.E. Albuquerque, NM 87108
- Agnes Wallbom, M.D., M.S., VA Greater Los Angeles Health Care System  
11301 Wilshire Blvd, Los Angeles, CA 90073
- Jessica Walsh, M.D., VA Salt Lake City Health Care System  
500 Foothill Drive, Salt Lake City, UT 84148
- John Wells, Ph.D., Edith Nourse Rogers Memorial Veterans Hospital  
200 Springs Road, Bedford, MA 01730
- Jeffrey Whittle, M.D., M.P.H., Clement J. Zablocki VA Medical Center  
5000 West National Avenue, Milwaukee, WI 53295
- Mary Whooley, M.D., San Francisco VA Health Care System  
4150 Clement Street, San Francisco, CA 94121

- Allison E. Williams, N.D., Ph.D., R.N, Bay Pines VA Healthcare System  
10,000 Bay Pines Blvd Bay Pines, FL 33744
- Peter Wilson, M.D., Atlanta VA Medical Center  
1670 Clairmont Road, Decatur, GA 30033
- Junzhe Xu, M.D., VA Western New York Healthcare System  
3495 Bailey Avenue, Buffalo, NY 14215-1199
- Shing Shing Yeh, Ph.D., M.D., Northport VA Medical Center  
79 Middleville Road, Northport, NY 11768
